# Supplementary material for: Common data elements for predictors of pediatric sepsis: A framework to standardize data collection
Source: PubMed Central journal article supplement (PMC8192005; doi:10.1371/journal.pone.0253051), 2021-06-10
Supplement: pone.0253051.s003.pdf [file pone.0253051.s003.pdf]

**S3 Table. Preliminary list of predictor variables compiled through literature review (N=144). Displays decision to include (N=77) or exclude (N=67) from the common data element set, and reason for exclusion where applicable.**

| Variable                                   | Step 1     | Step 2   | Reason for Exclusion                     | Tier |
|--------------------------------------------|------------|----------|------------------------------------------|------|
| <b>Patient Characteristics</b>             |            |          |                                          |      |
| Age                                        | Included   |          |                                          | 1    |
| Gender                                     | Included   |          |                                          | 1    |
| Time since last hospitalization            | Included   |          |                                          | 2    |
| Duration of illness/sign/symptom           | Excluded   |          | Low perceived predictive value           |      |
| Referral (urgent)                          | Included   |          |                                          | 2    |
| Distance from hospital                     | Discussion | Excluded | Low perceived predictive value           |      |
| Immunizations up to date                   | Discussion | Included |                                          | 3    |
| History of no cry at birth                 | Excluded   |          | Low perceived predictive value           |      |
| History of feeding problem since birth     | Included   |          |                                          | 2    |
| <b>Pregnancy/Birth Details</b>             |            |          |                                          |      |
| Born at home                               | Discussion | Excluded | Captured in "Facility of Birth" variable |      |
| Facility of birth (reported)               | Discussion | Included |                                          | 2*   |
| Attendant at birth (reported)              | Included   |          |                                          | 2*   |
| Delivered by a skilled attendant           | Discussion | Excluded | Low perceived predictive value           |      |
| Duration of labour                         | Excluded   |          | Low perceived predictive value           |      |
| Duration of rupture of membrane            | Excluded   |          | Low perceived predictive value           |      |
| Premature rupture of membranes             | Excluded   |          | Low perceived predictive value           |      |
| Ballard score                              | Excluded   |          | Measurement reliability                  |      |
| Number of postnatal care visits (reported) | Included   |          |                                          | 2*   |
| <b>Sociodemographic Information</b>        |            |          |                                          |      |

Common data elements for predictors of pediatric sepsis: A framework to standardize data collection

|                                      |            |          |                                |    |
|--------------------------------------|------------|----------|--------------------------------|----|
| Mother alive                         | Included   |          |                                | 2  |
| Maternal age (years)                 | Included   |          |                                | 2  |
| Maternal education                   | Included   |          |                                | 2  |
| Maternal fever                       | Excluded   |          | Low perceived predictive value |    |
| Maternal persistent cough            | Excluded   |          | Low perceived predictive value |    |
| Maternal HIV                         | Included   |          |                                | 1  |
| Child HIV status                     | Included   |          |                                | 1  |
| Exclusive breastfeeding              | Included   |          |                                | 2  |
| Number of children in family         | Excluded   |          | Low perceived predictive value |    |
| Siblings death                       | Excluded   |          | Low perceived predictive value |    |
| Bed-net use                          | Discussion | Included |                                | 2* |
| Consider malaria risk                | Excluded   |          | Measurement reliability        |    |
| Boil all drinking water              | Discussion | Included |                                | 3* |
| Water source for drinking (reported) | Discussion | Included |                                | 3* |
| Latrine available (reported)         | Discussion | Included |                                | 3* |
| <b>Anthropometric Data</b>           |            |          |                                |    |
| Weight                               | Included   |          |                                | 1  |
| Length                               | Included   |          |                                | 1  |
| MUAC                                 | Included   |          |                                | 1  |
| <b>Vitals</b>                        |            |          |                                |    |
| Temperature                          | Included   |          |                                | 1  |
| HR                                   | Included   |          |                                | 1  |
| RR                                   | Included   |          |                                | 1  |
| SpO2                                 | Included   |          |                                | 1  |
| SBP (raw)                            | Discussion | Excluded | Low perceived predictive value |    |
| DBP (raw)                            | Discussion | Excluded | Low perceived predictive value |    |

Common data elements for predictors of pediatric sepsis: A framework to standardize data collection

| <b>Clinical Signs/Symptoms</b>      |          |  |                                |    |
|-------------------------------------|----------|--|--------------------------------|----|
| <b>Respiratory</b>                  |          |  |                                |    |
| Apnea (reported)                    | Excluded |  | Low perceived predictive value |    |
| Apnea (observed)                    | Excluded |  | Low perceived predictive value |    |
| Difficulty Breathing (reported)     | Included |  |                                | 1  |
| Difficulty breathing (observed)     | Included |  |                                | 1  |
| Fast breathing (reported)           | Excluded |  | Measurement reliability        |    |
| Fast breathing (observed)           | Excluded |  | Measurement reliability        |    |
| Runny nose (reported)               | Included |  |                                | 3* |
| Respiratory effort (observed)       | Excluded |  | Measurement reliability        |    |
| Obstructed breathing (observed)     | Included |  |                                | 2  |
| Central cyanosis (observed)         | Included |  |                                | 2  |
| Chest in-drawing (observed)         | Included |  |                                | 2  |
| Nasal flaring (observed)            | Included |  |                                | 2  |
| Grunting (observed)                 | Included |  |                                | 2  |
| Head bobbing/nodding (observed)     | Included |  |                                | 2  |
| Crepitations (observed)             | Included |  |                                | 2  |
| Stridor (observed)                  | Included |  |                                | 2  |
| Wheezing (observed)                 | Included |  |                                | 2  |
| Cough (reported)                    | Excluded |  | Low perceived predictive value |    |
| <b>Circulation/Perfusion</b>        |          |  |                                |    |
| Capillary Refill Time               | Excluded |  | Measurement reliability        |    |
| Prolonged capillary refill          | Included |  |                                | 1  |
| Skin cold (cool peripheries)        | Included |  |                                | 2  |
| Weak and fast pulse                 | Included |  |                                | 2  |
| Pallor - palmar, oral, conjunctival | Included |  |                                | 2  |

Common data elements for predictors of pediatric sepsis: A framework to standardize data collection

|                                                    |            |          |                                |   |
|----------------------------------------------------|------------|----------|--------------------------------|---|
| Mother feels baby is cold                          | Included   |          |                                | 3 |
| <b>Dehydration</b>                                 |            |          |                                |   |
| WHO dehydration scale                              | Excluded   |          | Measurement reliability        |   |
| Pinching of the skin of abdomen/hand (skin turgor) | Included   |          |                                | 2 |
| Sunken eyes                                        | Included   |          |                                | 2 |
| Depressed fontanelle                               | Included   |          |                                | 2 |
| No tears when crying                               | Included   |          |                                | 2 |
| Reduced urine production                           | Excluded   |          | Low perceived predictive value |   |
| Thirst                                             | Discussion | Excluded | Measurement reliability        |   |
| Dry oral mucosa                                    | Included   |          |                                | 2 |
| <b>Neurological</b>                                |            |          |                                |   |
| Irritability (restlessness) (reported)             | Excluded   |          | Measurement reliability        |   |
| Consolability (reported)                           | Excluded   |          | Measurement reliability        |   |
| Change in level of activity (reported)             | Excluded   |          | Measurement reliability        |   |
| Change in crying (reported)                        | Excluded   |          | Measurement reliability        |   |
| Quality of crying (reported)                       | Excluded   |          | Measurement reliability        |   |
| Sleepiness/drowsiness/unconscious (reported)       | Excluded   |          | Measurement reliability        |   |
| Ease of awakening (reported)                       | Excluded   |          | Measurement reliability        |   |
| Convulsions (reported)                             | Included   |          |                                | 2 |
| Convulsions (observed)                             | Included   |          |                                | 2 |
| Limbs became limp (reported)                       | Excluded   |          | Low perceived predictive value |   |
| Neck pain/stiffness (reported)                     | Included   |          |                                | 2 |
| Stiff neck (observed)                              | Included   |          |                                | 2 |
| Stiff limbs (observed)                             | Included   |          |                                | 2 |
| Hypotonia (observed)                               | Included   |          |                                | 2 |
| Not able to drink or feed anything (reported)      | Included   |          |                                | 2 |

Common data elements for predictors of pediatric sepsis: A framework to standardize data collection

|                                              |            |          |                                |   |
|----------------------------------------------|------------|----------|--------------------------------|---|
| Not feeding well (observed)                  | Excluded   |          | Low perceived predictive value |   |
| Not suckling/breastfeeding (reported)        | Included   |          |                                | 2 |
| Quality of suck (reported)                   | Excluded   |          | Measurement reliability        |   |
| Prostration (reported)                       | Excluded   |          | Measurement reliability        |   |
| Spontaneous movements/to stimulus (observed) | Excluded   |          | Measurement reliability        |   |
| Bulging fontanelles (observed)               | Included   |          |                                | 2 |
| Mobility (observed)                          | Excluded   |          | Measurement reliability        |   |
| Focal neurology acute (observed)             | Excluded   |          | Measurement reliability        |   |
| Confusion (observed)                         | Excluded   |          | Measurement reliability        |   |
| Lethargy (AVPU) (observed)                   | Included   |          |                                | 1 |
| Blantyre Coma Scale <5 (observed)            | Excluded   |          | Measurement reliability        |   |
| <b>Infection</b>                             |            |          |                                |   |
| Fever                                        | Discussion | Excluded | Measurement reliability        |   |
| Suspected measles                            | Excluded   |          | Measurement reliability        |   |
| History of measles                           | Excluded   |          | Measurement reliability        |   |
| Ear pain                                     | Discussion | Excluded | Low perceived predictive value |   |
| Ear discharge (ex. pus)                      | Discussion | Excluded | Low perceived predictive value |   |
| Tender swelling behind the ear               | Discussion | Excluded | Low perceived predictive value |   |
| Otitis media                                 | Excluded   |          | Low perceived predictive value |   |
| Purulent drainage eyes                       | Excluded   |          | Low perceived predictive value |   |
| Conjunctivitis                               | Excluded   |          | Low perceived predictive value |   |
| Rash                                         | Included   |          |                                | 2 |
| Skin pustules                                | Discussion | Excluded | Low perceived predictive value |   |
| Hardening of skin                            | Excluded   |          | Low perceived predictive value |   |
| Jaundice                                     | Discussion | Included |                                | 1 |
| Umbilicus - red                              | Included   |          |                                | 2 |

Common data elements for predictors of pediatric sepsis: A framework to standardize data collection

|                                                             |            |          |                                |    |
|-------------------------------------------------------------|------------|----------|--------------------------------|----|
| Umbilicus - draining (pus)                                  | Included   |          |                                | 2  |
| Look for ulcers or white patches in the mouth (oral thrush) | Included   |          |                                | 2  |
| Risus sardonicus                                            | Excluded   |          | Low perceived predictive value |    |
| Tetanic spasms, spasticity                                  | Excluded   |          | Low perceived predictive value |    |
| Signs of local bacterial infections                         | Excluded   |          | Measurement reliability        |    |
| <b>GI/GU</b>                                                |            |          |                                |    |
| Diarrhea (reported)                                         | Included   |          |                                | 1  |
| Blood in stool (dysentery) (reported)                       | Included   |          |                                | 2  |
| Vomiting (reported)                                         | Included   |          |                                | 1  |
| Abdominal pain (reported)                                   | Included   |          |                                | 2  |
| Abdominal distension (observed)                             | Included   |          |                                | 3* |
| Foul-smelling urine (reported)                              | Excluded   |          | Low perceived predictive value |    |
| <b>Malnutrition</b>                                         |            |          |                                |    |
| Too small                                                   | Excluded   |          | Measurement reliability        |    |
| Swelling of both feet (peripheral edema)                    | Included   |          |                                | 2* |
| Visible severe wasting (marasmus)                           | Included   |          |                                | 3* |
| <b>Trauma/Surgical</b>                                      |            |          |                                |    |
| Malformation                                                | Excluded   |          | Measurement reliability        |    |
| Trauma (or other surgical condition)                        | Included   |          |                                | 2  |
| Eye injury                                                  | Discussion | Excluded | Captured in "Trauma" variable  |    |
| Fracture                                                    | Discussion | Excluded | Captured in "Trauma" variable  |    |
| Dislocation                                                 | Discussion | Excluded | Captured in "Trauma" variable  |    |
| Hemorrhage                                                  | Discussion | Excluded | Captured in "Trauma" variable  |    |
| Severe Pain                                                 | Discussion | Included |                                | 3* |
| Burns                                                       | Included   |          |                                | 2  |

Common data elements for predictors of pediatric sepsis: A framework to standardize data collection

|                              |            |          |                                |   |
|------------------------------|------------|----------|--------------------------------|---|
| Poisoning                    | Included   |          |                                | 2 |
| <b>Other</b>                 |            |          |                                |   |
| History of diabetes          | Excluded   |          | Low perceived predictive value |   |
| Sleep quality                | Excluded   |          | Measurement reliability        |   |
| Smiling (older than 6 weeks) | Discussion | Excluded | Measurement reliability        |   |
| Parental concern             | Discussion | Excluded | Measurement reliability        |   |
| <b>Laboratory Testing</b>    |            |          |                                |   |
| Hemoglobin (g/dL)            | Included   |          |                                | 2 |
| Malaria blood smear          | Included   |          |                                | 1 |
| Blood sugar measurement      | Included   |          |                                | 2 |

\*Consensus for tiering achieved post-discussion (Step 5).
