# Supplementary material for: Common data elements for predictors of pediatric sepsis: A framework to standardize data collection
Source: PubMed Central journal article supplement (PMC8192005; doi:10.1371/journal.pone.0253051), 2021-06-10
Supplement: pone.0253051.s004.pdf [file pone.0253051.s004.pdf]

**S4 Table. Additional predictor variables proposed in Step 3 (N=64). Displays decision to include (N=39) or exclude (N=25) from the common data element set, and exclusion reason or importance tier as applicable.**

| Variable                                                                                           | Status   | Reason for exclusion           | Tier |
|----------------------------------------------------------------------------------------------------|----------|--------------------------------|------|
| <b>Patient Characteristics</b>                                                                     |          |                                |      |
| Admission within 6 months (reported)                                                               | Included |                                | 1    |
| Number of times hospitalized within 6 months (reported)                                            | Included |                                | 2*   |
| Length of Illness prior to seeking help (days, reported)                                           | Included |                                | 2*   |
| Prior care for this illness                                                                        | Excluded | Low perceived predictive value |      |
| Mode of transport to hospital                                                                      | Excluded | Low perceived predictive value |      |
| History of fever                                                                                   | Included |                                | 1    |
| <b>Pregnancy/Birth Details</b>                                                                     |          |                                |      |
| Birth weight                                                                                       | Included |                                | 1    |
| Gestational age                                                                                    | Included |                                | 1    |
| Mode of delivery                                                                                   | Excluded | Low perceived predictive value |      |
| Details of cord after birth                                                                        | Excluded | Low perceived predictive value |      |
| Number of antenatal care visits                                                                    | Included |                                | 2*   |
| <b>Sociodemographic Information</b>                                                                |          |                                |      |
| Primary caregiver                                                                                  | Included |                                | 1    |
| Primary caregiver sex                                                                              | Excluded | Low perceived predictive value |      |
| Primary caregiver age                                                                              | Excluded | Low perceived predictive value |      |
| Primary caregiver marital status                                                                   | Excluded | Low perceived predictive value |      |
| Maternal age at first pregnancy                                                                    | Excluded | Low perceived predictive value |      |
| Mother acutely ill                                                                                 | Excluded | Low perceived predictive value |      |
| Maternal chronic illness requiring ongoing treatment or follow- up (HIV, TB, mental illness, etc.) | Excluded | Low perceived predictive value |      |

Common data elements for predictors of pediatric sepsis: A framework to standardize data collection

|                                                                      |          |                                |    |
|----------------------------------------------------------------------|----------|--------------------------------|----|
| Maternal substance use in last 30 days (check all that apply)        | Excluded | Low perceived predictive value |    |
| Maternal HIV treatment status                                        | Excluded | Low perceived predictive value |    |
| Non-exclusive breastfeeding details                                  | Excluded | Low perceived predictive value |    |
| Number of people in child's house                                    | Excluded | Low perceived predictive value |    |
| Cooking fuel                                                         | Excluded | Low perceived predictive value |    |
| Cooking location                                                     | Excluded | Low perceived predictive value |    |
| Lighting                                                             | Excluded | Low perceived predictive value |    |
| Smoking                                                              | Excluded | Low perceived predictive value |    |
| <b>Vitals</b>                                                        |          |                                |    |
| Modality of oxygen delivery                                          | Included |                                | 2  |
| Flow of oxygen delivered                                             | Included |                                | 2  |
| Fractional inspired oxygen                                           | Included |                                | 2  |
| <b>Clinical Signs/Symptoms</b>                                       |          |                                |    |
| <b>Respiratory</b>                                                   |          |                                |    |
| Inability to feed because of respiratory problems (reported)         | Included |                                | 2  |
| Inability to sit or stand because of respiratory problems (reported) | Included |                                | 2  |
| Deep breathing (observed)                                            | Excluded | Measurement Reliability        |    |
| Cough (observed)                                                     | Included |                                | 1  |
| Tracheal tug (observed)                                              | Included |                                | 2  |
| <b>Circulation/Perfusion</b>                                         |          |                                |    |
| Lower limb temperature gradient                                      | Included |                                | 2* |
| <b>Dehydration</b>                                                   |          |                                |    |
| Changes in urine colour                                              | Excluded | Low perceived predictive value |    |
| <b>Neurological</b>                                                  |          |                                |    |
| Irritability/restlessness (observed)                                 | Included |                                | 2  |
| Eye movement (Blantyre Coma Scale) (observed)                        | Excluded | Measurement Reliability        |    |

Common data elements for predictors of pediatric sepsis: A framework to standardize data collection

|                                                       |          |                         |   |
|-------------------------------------------------------|----------|-------------------------|---|
| Best motor response (Blantyre Coma Scale) (observed)  | Excluded | Measurement Reliability |   |
| Best verbal response (Blantyre Coma Scale) (observed) | Excluded | Measurement Reliability |   |
| <b>Infection</b>                                      |          |                         |   |
| Muscle tone                                           | Excluded | Measurement Reliability |   |
| TB contact                                            | Excluded | Measurement Reliability |   |
| <b>Laboratory Testing</b>                             |          |                         |   |
| HIV testing                                           | Included |                         | 1 |
| Lactate (mmol/L)                                      | Included |                         | 2 |
| Bilirubin measurement                                 | Included |                         | 2 |
| WBC                                                   | Included |                         | 2 |
| pH                                                    | Included |                         | 3 |
| Potassium (mmol/L)                                    | Included |                         | 3 |
| Base excess (mmol/L)                                  | Included |                         | 3 |
| Nasopharyngeal swab                                   | Included |                         | 3 |
| <b>Treatments Received Prior to Study</b>             |          |                         |   |
| Receipt of antibiotics prior to recruitment           | Included |                         | 2 |
| Receipt of antipyretics prior to recruitment          | Included |                         | 2 |
| Receipt of IV fluids prior to recruitment             | Included |                         | 2 |
| Receipt of other medication prior to recruitment      | Included |                         | 3 |
| Route of antibiotics                                  | Included |                         | 3 |
| Type of antibiotic                                    | Included |                         | 3 |
| Time since last antibiotic                            | Included |                         | 3 |
| Time since last antipyretic                           | Included |                         | 3 |
| Type of antipyretic                                   | Included |                         | 3 |
| Route of medication                                   | Included |                         | 3 |
| Type of medication                                    | Included |                         | 3 |

Common data elements for predictors of pediatric sepsis: A framework to standardize data collection

|                                                       |          |  |   |
|-------------------------------------------------------|----------|--|---|
| Visit to any healthcare provider prior to recruitment | Included |  | 3 |
| What type of healthcare provider                      | Included |  | 3 |
| Number of providers                                   | Included |  | 3 |

\*Consensus for tiering achieved post-discussion (Step 5).
